# Adaptation of cyanobacteria to the endolithic light spectrum in hyper-arid deserts

Bayleigh Murray<sup>1</sup>, Emine Ertekin<sup>1</sup>, Micah Dailey<sup>1#</sup>, Nathan T. Soulier<sup>3</sup>, Gaozhong Shen<sup>3</sup>, Donald A. Bryant<sup>3</sup>, Cesar Perez-Fernandez<sup>1</sup>, Jocelyne DiRuggiero<sup>1,2,\*</sup>

<sup>1</sup> The Johns Hopkins University, Department of Biology, Baltimore, Maryland, USA

<sup>2</sup> The Johns Hopkins University, Department of Earth and Planetary Sciences, Baltimore, Maryland, USA

<sup>3</sup> The Pennsylvania State University, Department of Biochemistry and Molecular Biology, PA, USA

\* Correspondence: [jdiruggiero@jhu.edu](mailto:jdiruggiero@jhu.edu)

# Present address: Duke University, University Program in Genetics and Genomics, Durham, NC, USA

**Abstract:** In hyper-arid deserts, endolithic microbial communities survive in the pore spaces and cracks of rocks, an environment that enhances water retention and filters UV radiation. The rock colonization zone is enriched in far-red light (FRL) and depleted in visible light. This poses a challenge to cyanobacteria, which are the primary producers of endolithic communities. Many species of cyanobacteria are capable of Far-Red Light Photoacclimation (FaRLiP), a process in which FRL induces the synthesis of specialized chlorophylls and remodeling of the photosynthetic apparatus, providing the ability to grow in FRL. While FaRLiP has been reported in cyanobacteria from various low-light environments, our understanding of light adaptations for endolithic cyanobacteria remains limited. Here, we demonstrated that endolithic *Chroococidiopsis* isolates from deserts around the world synthesize chlorophyll *f*, an FRL-specialized chlorophyll when FRL is the sole light source. The metagenome-assembled genomes of these isolates encoded chlorophyll *f* synthase and all the genes required to implement the FaRLiP response. We also present evidence of FRL-induced changes to the major light-harvesting complexes of a *Chroococidiopsis* isolate. These findings indicate that endolithic cyanobacteria from hyper-arid deserts use FRL photo-acclimation as an adaptation to the unique light transmission spectrum of their rocky habitat.

**Keywords:** cyanobacteria, endoliths; desert, Far-Red Light Photoacclimation, metagenome, chlorophylls, photosystems

## 1. Introduction

In hyper-arid deserts, microorganisms colonize the pore spaces and cracks of translucent rock substrates as a strategy to overcome xeric stress and extreme solar irradiance [1,2]. Substrate properties, such as translucence and pore structure and size, are essential for providing a stable space for colonization that filters high UV radiation, enhances water retention, and allows for photosynthesis [3]. The microbial communities encased in these rocky habitats are called endoliths (within rock) and typically colonize the first few millimeters under the rock surface [4]. Molecular studies of endolithic communities from gypsum, calcite, ignimbrite, sandstone, halite, and granite, revealed ecosystems spanning all domains of life, multiple trophic levels, and the presence of diverse viruses [5–9]. Cyanobacteria and algae are the primary producers of endolithic communities and, as such, are essential to these ecosystems [4,6,10,11].

Cyanobacteria are oxygenic photosynthesizers that convert photosynthetically visible light (400-700 nm) into chemical energy using complex molecular machinery, including light-harvesting and energy-transducing complexes, pigment biosynthesis, photosensory proteins, and associated response regulators [12]. Endolithic cyanobacteria from arid deserts are primarily members of the orders *Chroococcales* (*Chroococidiopsis* and *Gloeocapsa*), *Nostocales*, and *Oscillatoriales* [2,7,9]. The ability to respond to light properties is essential for phototrophs in the endolithic habitat, where the rock substrate imposes severe physical constraints on light transmission. For instance, light transmission at 665 nm wavelength and 2 mm deep inside calcite, granite, and gypsum rocks varied from 0.01%

to 0.1% of the incident light in the Atacama Desert, Chile (2,500  $\mu\text{mol photons m}^{-2} \text{s}^{-1}$ ) [4,13]. Values within the same order of magnitude were measured in the interior of halite nodules from the Atacama Desert, with as little as  $\sim 0.1 \mu\text{mol photons m}^{-2} \text{s}^{-1}$  deep in the nodule interior [6], and under quartz rocks from the Namib Desert [14]. More remarkable was the differential light transmission across wavelengths for all rocks, resulting in a shift of the transmitted solar spectrum towards far-red light (FRL) [4,6]; this agreed with findings that red light wavelengths penetrate deeper into rocks than blue light wavelengths [15].

A variety of light-harvesting strategies to low quantum flux densities and FRL have been described in cyanobacteria, from the synthesis of substituted variants of chlorophyll *a* (Chl *a*) to spectral tuning of light-harvesting antennae [16–18]. In the far-red light photoacclimation (FaRLiP) response, cyanobacteria exposed to FRL (>700nm) were found to remodel the core subunits of their photosynthetic apparatus and produce chlorophyll *f* (Chl *f*) and Chl *d*, both red-shifted chlorophylls, allowing the harvesting of photons in the FRL range [19–21]. The FaRLiP response is regulated by an FRL-induced signaling cascade composed of RfpA, (a knotless phytochrome that senses FRL), RfpB (a DNA-binding response regulator), and RfpC (a signal receiver). These regulators control a gene cluster that includes paralogs for subunits of photosystem I (PSI), photosystem II (PSII), and phycobiliproteins (PBP) [22]. ChlF, a highly divergent paralog of a PSII reaction center protein (PsbA) encodes Chl *f* synthase, a photo-oxidoreductase acting on Chl *a* [17,23]. Phylogenetic analyses suggest that *psbA4* is likely to have resulted from a duplication of the *psbA* gene [24,25]. Unlike PsbA, Chl *f* synthase cannot bind the  $\text{Mn}_4\text{Ca}_1\text{O}_5$  cluster (preventing water oxidation) but retains a key tyrosine YZ residue and amino acid residues for binding the plastoquinone molecules required for catalytic activity (allowing for the structural change of Chl *a* or chlorophyllide *a*).

Chl *f*-producing cyanobacteria have been isolated from various low-light environments, including dense microbial mats, lakes, caves, soil, stromatolites, beach rock biofilms, and multiple niches in subtropical forest ecosystems [26–29]. The wide distribution of Chl *f* synthesizing cyanobacteria was recently demonstrated using the phycobilisome linker gene *apcE2* as a marker of FRL-photosynthesis systems [26]. While photosynthetic efficiency is ultimately reduced in the FaRLiP response, it enables cyanobacteria to persist in numerous habitats with low visible light [30]. Despite substantial information about photosynthetic light-harvesting strategies and the associated molecular machinery in many cyanobacteria, our knowledge of light adaptation for endolithic cyanobacteria from hyper-arid deserts remains limited. We used spectroscopy, chromatography, and metagenome annotation to characterize the adaptation of endolithic cyanobacteria we previously isolated from the Atacama and Negev Deserts to the FRL spectrum of their rocky habitat.

## 2. Materials and Methods

*Cyanobacteria cultures and FRL exposure.* Cyanobacterial isolates were obtained from colonized gypsum and calcite samples collected in the Atacama Desert [4] and sandstone samples collected in the Negev desert [10] as described in Murray et al. 2021 (Table S1). *Microcystis aeruginosa* isolated from Lake Tai, China, was a gift from Feng Chen (IMET, University of Maryland). Cultures were grown in BG-11 liquid medium [31], at RT, under either 24  $\mu\text{moles photons m}^{-2} \text{s}^{-1}$  of visible light (VL) using Philips Daylight Deluxe Linear Fluorescent T12 40-W Light Bulbs and a combination of neutral density filters (299 1.2ND and 298 0.15ND, Lee Filters, Burbank, CA) or 20  $\mu\text{moles photons m}^{-2} \text{s}^{-1}$  of FRL provided by a Flower Initiator 730 nm LED lamp (TotalGrow, Holland, MI). See Fig. S1 for the spectra of the VL and FRL lamps.

*Microscopy.* Light microscopy photos were taken from diluted stock cultures under 1000 x magnification using an Axioplan II microscope (Zeiss, Jena, Germany) with

QImaging QIClick CCD (Teledyne QImaging, British Columbia, Canada) & SensiCam High-Performance cameras (The Cooke Corporation, Romulus, Michigan). Images were captured and adjusted for clarity with Slidebook 6.

*Whole-cell analyses.* Whole-cell absorbance spectra from 550 to 800 nm were taken from cells grown in BG-11 under VL and FRL for 30 days using a DU 640 spectrophotometer and associated software (Beckman Coulter, Brea, CA). For low-temperature fluorescence measurements at 77 K, cells resuspended in 60% glycerol were frozen in liquid nitrogen, and spectra were obtained using an SLM Model 8000C spectrofluorometer (On-Line Instruments, Inc., Bogart, GA) [19,22]. Excitation wavelengths of 440 nm and 590 nm were chosen to preferentially excite chlorophylls and phycobilins, respectively [17].

*Pigment extraction and analysis.* Cells of cyanobacterial cultures were harvested by centrifugation, washed once in 50 mM HEPES/NaOH buffer, pH 7.0, and the cell pellets were flash-frozen. Pigments were extracted by resuspending the pellets in a 7:2 (v/v) ratio of acetone: methanol and vortexing for 2 min. The mixture was centrifuged, and the supernatant was filtered with a 0.2µm polytetrafluoroethylene membrane before analysis [20]. Room temperature absorption spectra from extracted pigments were obtained with a Cary 14 UV-Vis-NIR spectrophotometer modified for computer-controlled operation by OLIS Inc. (Bogart, GA). Extracted pigments were also analyzed by reversed-phase high-performance liquid chromatography (HPLC) using an Agilent 1100 HPLC system (Agilent Technologies, Santa Clara, CA), fitted with an analytical Discovery C18 column (25 cm x 4.6 mm) (Supelco, Sigma-Aldrich, St. Louis, MO) [19].

*RNA extraction and qRT-PCR.* For isolation of total RNA from cells of cyanobacterial cultures grown for 48 h under FRL and VL, cells (2.5 ml) were harvested by centrifugation and the pellets flash-frozen. Cell pellets were resuspended in 1mL of cell lysis buffer (50 mM Tris-HCl, pH 7.5, 25 mM EDTA, 2% Sucrose) and 5µL SUPERase-in RNase Inhibitor (Invitrogen, Waltham, MA) before cryo-lysis with a SPEX 6870 Freezer Mill (SPEX Sample Prep, Metuchen, NJ) for 5 cycles (1 min grinding at 10 Hz, 1 min cooling). The resulting powder was resuspended in 1 mL µl of TRIzol LS reagent (Ambion, Inc, Austin, TX) and centrifuged at 4500 x g for 10 min at 4°C. Phases were separated by adding 200 µl chloroform and centrifuged at 4500 x g for 15 min at 4°C. RNA in the aqueous phase was precipitated with 2-propanol and centrifugation at 12000 x g for 10 min at 4°C. The RNA pellet was washed with 80% ethanol with centrifugation, resuspended in ddH<sub>2</sub>O, and treated with RNase-free DNase I (New England Biolabs, Ipswich, MA) for 1 hr at 37°C. The Zymo RNA Clean & Concentrator Kit (Zymo Research, Irvine, CA) was used for further purification and concentration of the RNA samples. RNA concentration was measured with the Qubit RNA HS Assay kit (Invitrogen). 500 ng of total RNA was used to synthesize cDNA with the Invitrogen SuperScript III First-Strand Synthesis System (Invitrogen, Waltham, MA) according to the manufacturer's recommendations. Primers specific to the *chlF* gene [5'-ATGGTGTCAAAGACAGACA-3' and 5'-TCATTAGTACTCCAAACCAG-3'] were designed from gene alignments of cyanobacterial isolate metagenomes (Murray et al. 2021). Primers for the beta subunit of RNA polymerase gene *rpoC2* [5'-ATGGTGTCAAAGACAGACA-3' and 5'-TCATTAGTACTCCAAACCAG-3'] were used for normalization. The PowerUP SYBR Green Master Mix (Applied Biosystems, Waltham, MA) was used to perform Q-RT-PCR with the standard protocol recommended by the manufacturer and a C1000 Touch Thermocycler CFX96 Real-Time System (Bio-Rad Laboratories, Hercules, CA), with the following cycles: 50°C for 2 min(UDG activation), 95°C for 2 min, and 40 cycles with 95°C for 15 s, 52°C (*Chl f* synthase primers) or 58°C (*RpoC2* primers) for 15 s, and 72°C for 1 min.

*FaRLiP cluster annotation.* To annotate the FaRLiP cluster, we used the *Chroococcidiopsis thermalis* phycobilisome rod-core linker polypeptide gene (*apcE2*) as a marker [26]. The gene was retrieved from Genbank and blasted against the cyanobacterial metagenome-

assembled genomes. The best matches and flanking 25 genes were retrieved to reconstruct the FaRLiP cluster. To annotate the Chl *f* synthase, we performed blastp analysis using a previously characterized Chl *f* synthase protein sequence as template (UniProtKB/Swiss-Prot: P0DOC9.1). Best matches with >70% amino acid identity were denoted as Chl *f* synthase. A similar analysis was carried out for the RfpABC proteins. The FaRLiP gene cluster was plotted and visualized using the 'dna features viewer' program implemented in python.

### 3. Results and Discussion

The endolithic cyanobacteria used in this work were previously isolated from sandstone rocks from the Negev Desert (S-NGV-2P1), calcite (C-VL-3P3), and gypsum (G-MTQ-3P2) rocks from the Atacama Desert [32]. A significant shift to FRL was reported for the light transmission spectra of these substrates [4]. Taxonomic annotations of most isolates were assigned to the genus *Chroococcidiopsis* based on metagenome sequences [32]. *Microcystis aeruginosa*, isolated from Lake Tai, China, was used as a non-endolithic control. The three endolithic isolates had similar cell morphologies by light microscopy, with large aggregates of cells surrounded by abundant extracellular polymeric substances (EPSs) (Fig. 1). Several aggregate morphologies typical to *Chroococcidiopsis* spp. were observed, including first rounds of divisions (Fig. 1A), single cells (Fig. 1B), and advanced "spore cleavage" that typically follows multiple rounds of division without growth (Fig. 1C) [33]. EPSs produced by cyanobacteria in arid environments are essential for retaining moisture and nutrients [34]. These complex heteropolysaccharides prevent water loss by forming a protective shield around the cells and enhance the retention of UV screening compounds [35]. In contrast, *M. aeruginosa*, isolated from a lake, did not form large aggregates and had no visible EPS (Fig. 1D).

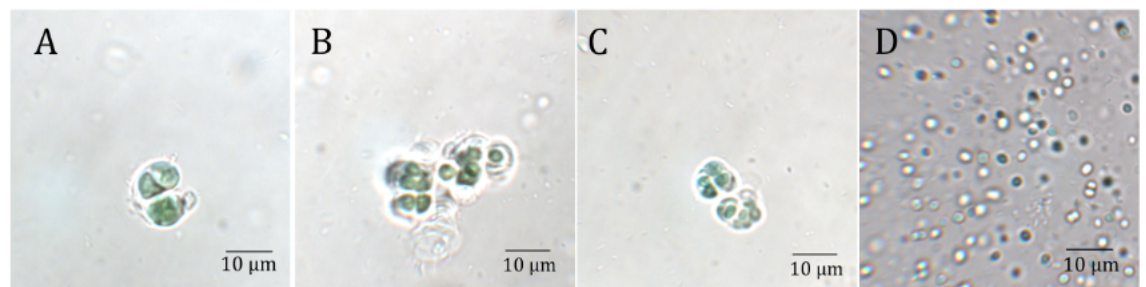

**Figure 1.** Light microscopy images of cyanobacteria isolated from several substrates and locations: (A) Sandstone from the Negev desert (S-NGV-2P1), (B) Calcite (C-VL-3P3) and (C) Gypsum (G-MTQ-3P2) from the Atacama Desert, and (D) *M. aeruginosa* isolated from Lake Tai, China.

#### 3.1. Endolithic cyanobacteria absorbed FRL photons

To determine whether the *Chroococcidiopsis* isolates could absorb FRL photons, we obtained whole-cell absorbance spectra of cultures grown for 30 days in VL and FRL (Fig. 2). Spectra for all *Chroococcidiopsis* isolates and *M. aeruginosa* grown in both light conditions showed an absorbance peak at 680 nm indicative of Chl *a*. A shoulder at 710 nm, indicative of the presence of Chl *f* [17], was only found in the spectra of endoliths grown in FRL. Chl *f* is a specialized chlorophyll synthesized from Chl *a* during the FaRLiP response, and it differs from Chl *a* by the presence of a formyl group at the C2 position [36]. In all *Chroococcidiopsis* spp. cultures, there was greater overall absorbance between 600 nm

and 700 nm in VL-grown cells when compared to FRL-grown cells, possibly in response to the higher photon flux at those wavelengths in VL conditions.

**Figure 2.** Comparison of absorbance spectra from whole-cell cultures grown under visible

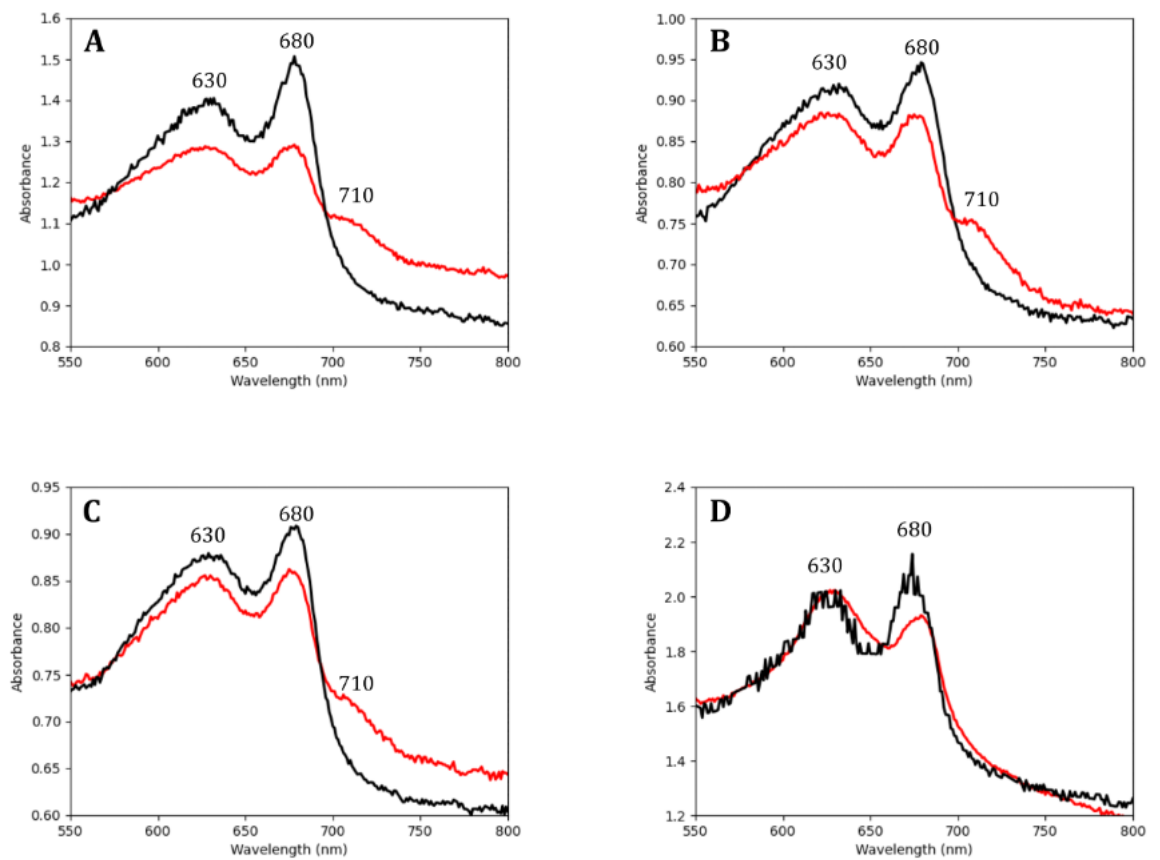

light (black line) and far-red light (red line) for *Chroococcidiopsis* spp. isolates from (A) 203  
Calcite (C-VL-3P3), (B) Gypsum (G-MTQ-2P3), (C) Sandstone (S-NGV-2P2), and from (D) 204  
*M. aeruginosa* from Lake Tai. Absorption peaks for PBP (at 630 nm), Chl *a* (at 680 nm), and 205  
Chl *f* (at 710 nm) are labeled. Cultures were grown under VL or FRL for 30 days before 206  
the experiment. Peaks were normalized to OD<sub>700</sub>. Each spectrum was the average of three 207  
measurements. 208

### 3.2. Pigments from FRL-grown *Chroococcidiopsis* contained Chl *f* and Chl *d* 209

The G-MTQ-3P2 *Chroococcidiopsis* spp. isolate was selected for further pigment anal- 211  
ysis. To validate the presence of the FRL-absorbing Chls in those cultures, we conducted 212  
analyses on methanol-extracted pigments from cultures grown for 30 days in VL and FRL. 213  
Similar to whole cells, the absorbance spectrum of pigments from cultures grown in FRL 214  
displayed the characteristic Chl *f* shoulder at ~705 nm [19,27], which was not found in the 215  
pigments from VL-grown cultures (Fig. 3A). In addition to the shoulder at 705 nm, we 216  
found an absorbance peak at 770 nm in pigments from the FRL-grown culture, which is 217  
characteristic of bacteriochlorophyll *a* (Bchl *a*) [37]. Reversed-phase HPLC of pigments 218  
from VL and FRL-grown cultures showed the presence of Chl *a*, eluting at ~ 47 min in both 219  
light conditions. Chl *f*, eluting at ~ 43 min, was only found in Chls extracted from FRL- 220  
grown cultures (Fig. 3B). BChl *a* and a small amount of Chl *d*, another “red-shifted” chlo- 221  
rophyll, were also detected in the pigments from cells grown in FRL. FRL activates the 222  
synthesis of Chl *d* in addition to Chl *f* [38], supporting our finding of a small amount of 223  
Chl *d* in FRL-grown cultures of the *Chroococcidiopsis* G-MTQ-3P2 isolate (Fig. 3B). 224

200  
201  
202  
203  
204  
205  
206  
207  
208  
209  
210  
211  
212  
213  
214  
215  
216  
217  
218  
219  
220  
221  
222  
223  
224  
225

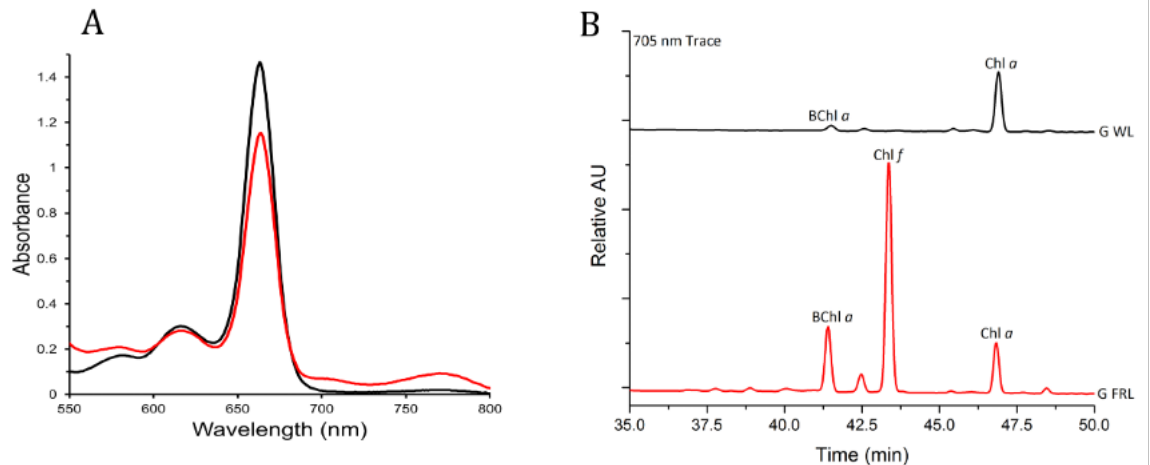

**Figure 3.** Absorption spectroscopy and HPLC analyses of pigments extracted from *Chroococcidiopsis* G-MTQ\_3P2 cultures grown in VL (black) and FRL (red). Pigments were extracted with a mixture of acetone and methanol. (A) Absorption spectra of total pigments from 550 to 800 nm. (B) Reversed-phase HPLC elution profiles at 705 nm; BChl *a* eluted at about 41 min, Chl *d* at approximately 42.5 min, Chl *f* at about 43.5 min, and Chl *a* at about 47 min under the conditions employed. Each spectrum was the average of three measurements.

FRL-activated photosystems were reported to have 7 Chl *f* out of 90 Chls in PSI and 4 Chl *f* and 1 Chl *d* out of 35 Chls in PSII [39–43]. We used values from the absorbance spectra of Fig. 3A to calculate the ratio of Chl *f*: Chl *a* in G-MTQ-3P2 cells grown in FRL. The fraction of Chl *f* absorption in the 663nm peak in FRL was removed by calculating the fraction of Chl *f* absorption in the 663 nm peak versus the 705 nm peak, using a Chl *f* 663/705 ratio of 0.150 calculated from Airs et al. [44], and by subtracting that fraction from the 663 nm absorption value in FRL. Extinction coefficients for Chl *a* ( $78.8 \times 10^3 \text{ L mol}^{-1} \text{ cm}^{-1}$ ) at 663 nm (and Chl *f* ( $77.97 \times 10^3 \text{ L mol}^{-1} \text{ cm}^{-1}$ ) at 705 nm) were used to calculate their respective amounts. We calculated a ratio of Chl *f*: Chl *a* of 1:17.6 for the *Chroococcidiopsis* G-MTQ-3P2 isolate, which was slightly higher than the value reported for *Chlorogloeopsis. fritschii* [44] and in line with the reported number of Chl *f* in FRL-acclimated PSII [39–42]. While the assembly and function of PSII in FRL require Chl *d*, the enzyme(s) performing the synthesis of Chl *d* remains unknown. Recent work with *Synechococcus* sp. PCC 7335 *apc* mutant strains suggested that cysteine-rich FRL allophycocyanin subunits might play a role in the synthesis or stabilization of the single Chl *d* molecule required for the assembly of PSII under FRL [38,43]. The findings that *Chroococcidiopsis* sp. strain G-MTQ-3P2 synthesized Chl *f* under FRL, together with a small amount of Chl *d*, strongly suggested that endolithic cyanobacteria might use the FaRLiP response to adapt to the red-shifted light of their rock environment.

The BChl *a* found in FRL-pigments is indicative of the presence of another bacterium in the culture of the *Chroococcidiopsis* G-MTQ-3P2 isolate. The absence of other BChls in the HPLC pigment analysis (Fig. 3B), and the peak at 770 nm in the pigment absorption spectrum (Fig. 3A), suggested that the photoheterotrophic bacterium in the G-MTQ-3P2 culture might belong to the purple bacteria [37]. These are anoxygenic photoheterotrophs from the phylum *Proteobacteria* with versatile metabolic capabilities [45]. The metagenome-assembled genome (MAG) from the G-MTQ-3P2 metagenome was assigned to *Chroococcidiopsis* through taxonomic annotation [32]. Additional contigs were annotated with BLAST and assigned to heterotrophic bacteria of the *Actinobacteria* (43.3%), *Proteobacteria* (<1%), and *Deinococcus* (<1%) phyla. While no purple bacteria were specifically annotated in the G-MTQ-3P2 metagenome, it is important to note that the metagenome was sequenced from DNA extracted from cultures grown in VL, potentially explaining the low relative abundance of putative Bchl *a*-producing proteobacteria. Under FRL,

purple bacteria can grow photoautotrophically at low oxygen levels [45], providing them with a competitive advantage. Because the cultures were grown without agitation, the cells likely settled to the bottom of the culture flasks forming a biofilm where low oxygen concentrations allowed them to grow.

### 3.3. PSI, PSII, and PBS have different spectral properties after FRL exposure

To determine whether endolithic cyanobacteria remodeled their photosynthetic machinery under FRL, we used 77K low-temperature fluorescence emission spectroscopy on G-MTQ-3P2 cultures grown in VL and FRL. The fluorescence emission spectrum with 440 nm excitation, optimized for Chl excitation, for VL-grown cultures showed emission peaks at 684 and 723 nm, indicating the association of Chl *a* with PSII and PSI, respectively (Fig. 4A) [20]. In the FRL-spectrum, the 684nm peak was larger, and there was no 723-nm peak (Fig. 4A). The increased signal of the Chl *a*-PSII complex in FRL was also observed in FRL-grown *Synechococcus* sp. PCC 7335 but not *Chlorogloeopsis* sp. PCC 9212 or *Leptolyngbya* sp. JSC-1 [21]. The FRL-spectrum of G-MTQ-3P2 contained peaks at 738 nm and 749 nm contributed from the Chl *f* and *d*-containing FRL-PS II and Chl *f*-containing FRL-PS I complexes, respectively [21]. A similar peak at 749 nm was also reported with FaRLiP acclimation of two other cyanobacteria, *Chroococidiopsis thermalis* PCC 7203 and *Fischerella thermalis* PCC 7521 [19]. The 718 nm peak observed in the G-MTQ-3P2 FRL-spectrum might be related to the fluorescence emission from FRL-AP cores, however, because 440 nm wavelength mostly excites chls, there might also be fluorescence emission from some remaining VL-PSI.

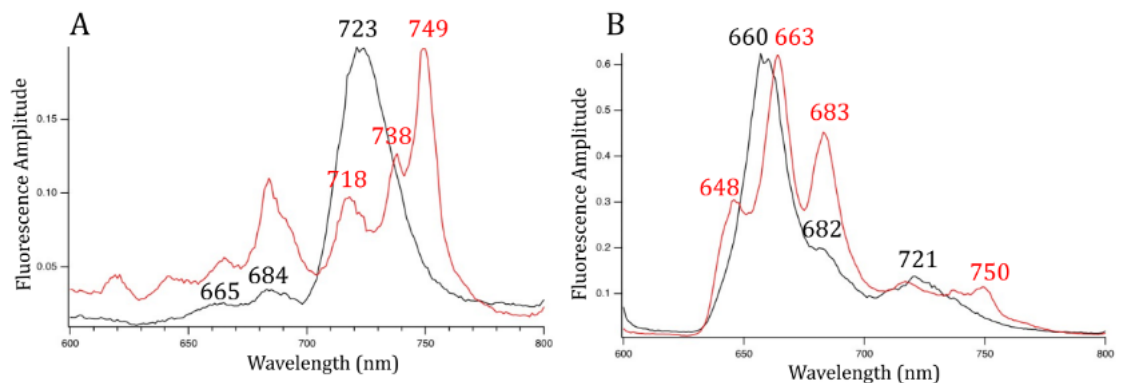

**Figure 4.** 77 K fluorescence emission spectra for *Chroococidiopsis* G-MTQ-3P2 cultures grown in VL (black line) and FRL (red line). (A) Excitation wavelength at 440 nm to excite Chls preferentially. (B) Excitation wavelength at 590 nm to excite PBP's preferentially. Cells were resuspended in 60% glycerol at OD<sub>780</sub> of 0.7. Each spectrum was the average of three measurements.

Low-temperature fluorescence emission spectroscopy with 590 nm excitation preferentially excites PBP. The energy transfer from these proteins to the photosystems provides another way to investigate changes to the light-harvesting machinery under FRL. At 590 nm excitation in VL-grown cells, we observed peaks at 660 and 682 nm, corresponding to allophycocyanin and ApcD and ApcE terminal emitters of the phycobilisome, respectively, and an additional peak at 721 nm (Fig. 4B). In contrast, in FRL, peaks of key phycobiliproteins, including allophycocyanin, and the PBS terminal emitter were red-shifted by a few nanometers. With 590 nm excitation, a 717 nm peak thought to be indicative of energy transfer from allophycocyanin to the Chl *f*-PSII complex [21] was not found in the FRL-grown cultures of *Chroococidiopsis* G-MTQ-3P2 (Fig. 4B). In the phycobilisome of FRL-grown *Leptolyngbya* sp. JSC-1 [46], pentacylindrical cores were replaced by bicylindrical cores as indicated by a peak at 730 nm. While we did not find a peak at 730 nm with G-MTQ-3P2, we found a peak at 750 nm that was indicative of the presence of long-wavelength chlorophylls in the PSI core in FRL-grown *C. thermalis* [41]. These differences

between strains indicated that they most likely used different strategies for remodeling their light-harvesting complexes in FRL.

### 3.4. FaRLiP gene clusters identified in endolithic *Chroococcidiopsis* metagenomes

Using multiple sequence alignments of amino acids, we identified the Chl *f* synthase gene (*chlF*) in metagenome-assembled genomes (MAGs) from all endolithic *Chroococcidiopsis* spp. isolates (Fig. S2). This gene is essential for the FaRLiP response because it encodes the photo-oxidoreductase that synthesizes Chl *f* from Chl *a* [17,23]. An amino acid alignment of ChlF from *C. fritschii* PCC 9212 with all PsbA proteins annotated in the G-MTQ-3P2 metagenome (Fig. S2) revealed that the endolithic ChlF sequences lack the 3 key amino acid residues required for binding the Mn<sub>4</sub>CaO<sub>5</sub> cluster, indicating that these proteins were not functional D1 core subunits of PSII [17]. The endolithic *Chroococcidiopsis* ChlF sequences were identical and shared 72% amino acid identity with ChlF from *Chlorogloopsis* sp. PCC 9212 and 56% identity with ChlF of *Synechococcus* sp. PCC 7335.

Functional annotation and BLAST analysis revealed the presence of FaRLiP-associated genes in all the *Chroococcidiopsis* spp. MAGs with an identical organization (Fig. 5, Table S2). These included paralogs of PSII, PSI, PBP, and the FaRLiP regulatory elements RfpB, RfpA, and RfpC [22]. Several hypothetical proteins were also found in the same genomic neighborhood. ApcE2, a gene encoding an FRL-associated phycobilisome linker and thought to be a marker of the FaRLiP response [26], was also found in the *Chroococcidiopsis* MAGs. The arrangement of the FaRLiP cluster from endolithic *Chroococcidiopsis* was nearly identical to that of *C. thermalis* PCC 7203. Both contain four paralogs of PSI genes, while six are found in many other species, including *Synechococcus* sp. PCC 7335, *Leptolyngbya* sp. JSC-1, and *Chlorogloopsis* sp. PCC 9212 [19]. As in all of these species, except *Leptolyngbya*, PSII paralogs flank the PBS genes and are located downstream of the regulatory *rfpABC* genes (Fig. 5).

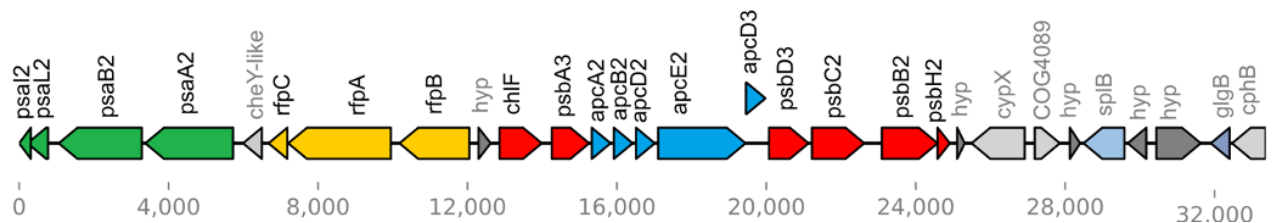

**Figure 5.** Gene map of the FaRLiP gene cluster found in the MAG of *Chroococcidiopsis* G-MTQ-3P2. Paralogs of PSII are in red, paralogs of PSII are in green, paralogs of phycobiliproteins are in blue, and regulatory genes are in yellow. Hypothetical genes are in dark grey, and genes involving other processes are in light blue and light grey.

### 3.5. The *chlF* gene was only expressed in FRL-grown cultures

We used qRT-PCR to test whether the endolithic *chlF* gene found in the genome of *Chroococcidiopsis* G-MTQ-3P2 was exclusively expressed in FRL-grown cells. We used Chl *f* synthase (*chlF*) gene-specific primers, designed from the multiple alignments of endolithic *chlF* genes, and primers for RNA polymerase protein *rpoC2*, as a housekeeping gene. Templates include RNA isolated from three biological replicates of *Chroococcidiopsis* G-MTQ-3P2 grown in both VL and FRL for 48 h. We found that the *chlF* gene was expressed exclusively in FRL-grown cells, whereas the *rpoC2* gene was expressed in both light conditions (Fig. 6), confirming the function of ChlF in the FaRLiP response of endolithic *Chroococcidiopsis*. Ct values for *chlF* were comparable to values for *rpoC2*, indicating non-negligible levels of expression for *chlF* in FRL.



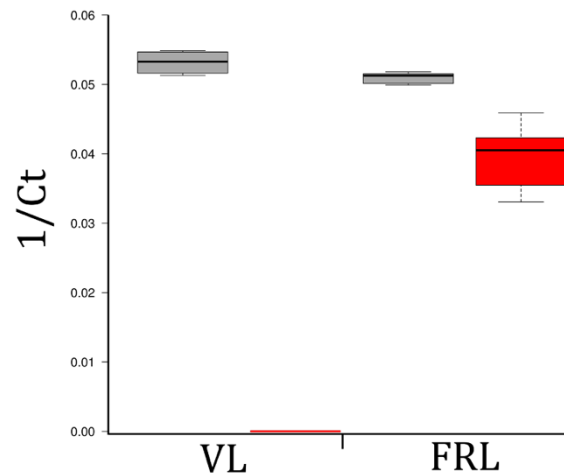

**Figure 6.** Chl *f* synthase expression under VL and FRL in *Chroococcidiopsis* G-MTQ-3P2 cultures. Box and whisker plot of the inverse Ct values from qRT-PCR for the *rpoC2* gene (grey) and the Chl *f* synthase, *chlF* gene (red). Three biological replicates and three technical replicates were used for each condition. The lines in the center of each box represent the median value. The top and bottom of each box represent the 25th and 75th percentiles. Whiskers extend to 1.5 times the interquartile range between these limits. N=9 sample points.

#### 4. Conclusion

Our characterization of several endolithic cyanobacteria isolated from the Atacama and Negev deserts revealed that they all encoded genes from the FaRLiP cluster, expressed Chl *f* synthase under FRL, and therefore used far-red light photoacclimation to perform oxygenic photosynthesis. Hyperspectral imaging previously demonstrated that the distribution of Chl *f* was related to the position of the cyanobacterial colonies in beach rock biofilms [29]. This work further provides evidence for the stratification of Chls and photosynthetic activity throughout lithic substrates [11]. Surprisingly, FaRLiP acclimation was not detected in hypolithic cyanobacteria from the Namib Desert [47]. Hypolithons are microbial communities colonizing the underside of quartz rocks and there are ubiquitous in arid deserts around the world. Instead, the presence of several orange carotenoid-like proteins (OCPs) in hypolithic cyanobacteria was suggested as a potential photoprotection against sudden changes in light influxes and as a protection against desiccation stress [47]. Hyper-arid environments impose multiple challenges to microbial life and endolithic cyanobacteria have evolved numerous survival strategies. While the rock substrate provides UV screening and enhanced water retention, it also filters photosynthetically active radiation required for primary production in the endolithic habitat. Despite some decrease in photosynthetic efficiency [30], we showed that FRL-acclimated photosynthetic proteins and pigments allowed endolithic *Chroococcidiopsis* spp. to optimize light-dependent energy production in their rocky habitat.

**Supplementary Materials:** The following supporting information can be downloaded at: [www.mdpi.com/xxx/s1](http://www.mdpi.com/xxx/s1), Table S1: Metadata and metagenome accession numbers; Table S2: Gene distribution in the FaRLiP cluster; Figure S1: Spectra of white and far-red lights; Figure S2: Protein alignment of Chl *f* synthase.

**Author Contributions:** Conceptualization, Jocelyne DiRuggiero; Formal analysis, Bayleigh Murray, Jocelyne DiRuggiero and Emine Ertekin; Funding acquisition, Jocelyne DiRuggiero; Investigation, Bayleigh Murray, Micah Dailey, Gaozhong Shen, Nathan Soulier and Cesar Perez-Fernandez; Resources, Donald Bryant; Writing – original draft, Bayleigh Murray and Jocelyne DiRuggiero; Writing – review & editing, Bayleigh Murray, Donald Bryant and Jocelyne DiRuggiero.

**Funding:** This work was supported by National Science Foundation Grant DEB1556574 and National Aeronautics and Space Administration Grant NNX15AP18G. Work in the laboratory of D. A. B. was supported by a grant from the U. S. National Science Foundation (MCB-1613022).

**Data Availability Statement:** The metagenome-assembled genomes (MAGs) and functional annotation are available from the JGI Genome Portal under the IMG taxon # 3300037877 for G-MTQ-3P2, 3300039404, for C-VL-3P3, and 3300039401 for S-NGV-2P1 {Murray et al., 2021} (Table S1).

**Acknowledgments:** We thank Dr. Feng Chen (IMET, University of Maryland) for providing us with a culture of *Microcystis aeruginosa* isolated from Lake Tai, China, the Johns Hopkins Integrated

Imaging Center for assistance with light microscopy, and Dr. P.R. McCullough (Space Telescope Science Institute and the Johns Hopkins University) for technical support with FRL exposures. 406  
407

**Conflicts of Interest:** The authors declare no conflict of interest. 408

409

## References

1. Pointing, S.B.; Belnap, J. Microbial Colonization and Controls in Dryland Systems. *Nat. Rev. Microbiol.* **2012**, *10*, 551–562, doi:10.1038/nrmicro2831. 410  
411  
412
2. Meslier, V.; DiRuggiero, J. *Endolithic Microbial Communities as Model Systems for Ecology and Astrobiology*; Elsevier Inc., 2019; ISBN 9780128127421. 413  
414
3. Walker, J.J.; Pace, N.R. Endolithic Microbial Ecosystems. *Annu. Rev. Microbiol.* **2007**, *61*, 331–347, doi:10.1146/annurev.micro.61.080706.093302. 415  
416
4. Meslier, V.; Casero, M.C.; Dailey, M.; Wierzchos, J.; Ascaso, C.; Artieda, O.; McCullough, P.R.; DiRuggiero, J. Fundamental Drivers for Endolithic Microbial Community Assemblies in the Hyperarid Atacama Desert. *Environ. Microbiol.* **2018**, *20*, 1765–1781, doi:10.1111/1462-2920.14106. 417  
418  
419
5. Crits-Christoph, A.; Gelsinger, D.R.; Ma, B.; Wierzchos, J.; Ravel, J.; Davila, A.; Casero, M.C.; DiRuggiero, J. Functional Interactions of Archaea, Bacteria and Viruses in a Hypersaline Endolithic Community. *Environ. Microbiol.* **2016**, *18*, 2064–2077, doi:10.1111/1462-2920.13259. 420  
421  
422
6. Uritskiy, G.; Munn, A.; Dailey, M.; Gelsinger, D.R.; Getsin, S.; Davila, A.; McCullough, P.R.; Taylor, J.; DiRuggiero, J. Environmental Factors Driving Spatial Heterogeneity in Desert Halophile Microbial Communities. *Front. Microbiol.* **2020**, *11*, 1–14, doi:10.3389/fmicb.2020.578669. 423  
424  
425
7. Ertekin, E.; Meslier, V.; Browning, A.; Treadgold, J.; DiRuggiero, J. Rock Structure Drives the Taxonomic and Functional Diversity of Endolithic Microbial Communities in Extreme Environments. *Environ. Microbiol.* **2021**, *23*, 3937–3956, doi:10.1111/1462-2920.15287. 426  
427  
428
8. Goordial, J.; Altshuler, I.; Hindson, K.; Chan-Yam, K.; Marcolenas, E.; Whyte, L.G. In Situ Field Sequencing and Life Detection in Remote (79°26'N) Canadian High Arctic Permafrost Ice Wedge Microbial Communities. *Front. Microbiol.* **2017**, *8*, 1–14, doi:10.3389/fmicb.2017.02594. 429  
430  
431
9. Archer, S.D.J.; de los Ríos, A.; Lee, K.C.; Niederberger, T.S.; Cary, S.C.; Coyne, K.J.; Douglas, S.; Lacap-Bugler, D.C.; Pointing, S.B. Endolithic Microbial Diversity in Sandstone and Granite from the McMurdo Dry Valleys, Antarctica. *Polar Biol.* **2017**, *40*, 997–1006, doi:10.1007/s00300-016-2024-9. 432  
433  
434
10. Qu, E.B.; Omelon, C.R.; Oren, A.; Meslier, V.; Cowan, D.A.; Maggs-Kölling, G.; DiRuggiero, J. Trophic Selective Pressures Organize the Composition of Endolithic Microbial Communities From Global Deserts. *Front. Microbiol.* **2020**, *10*, 1–15, doi:10.3389/fmicb.2019.02952. 435  
436  
437
11. Wierzchos, J.; DiRuggiero, J.; Vítek, P.; Artieda, O.; Souza-Egipsy, V.; Škaloud, P.; Tisza, M.J.; Davila, A.F.; Vílchez, C.; Garbayo, I.; et al. Adaptation Strategies of Endolithic Chlorophototrophs to Survive the Hyperarid and Extreme Solar Radiation Environment of the Atacama Desert. *Front. Microbiol.* **2015**, *6*, 1–17, doi:10.3389/fmicb.2015.00934. 438  
439  
440
12. Singh, N.K.; Sonani, R.R.; Prasad Rastogi, R.; Madamwar, D. The Phycobilisomes: An Early Requisite for Efficient Photosynthesis in Cyanobacteria. *EXCLI J.* **2015**, *14*, 268–289, doi:10.17179/excli2014-723. 441  
442
13. Cordero, R.R.; Seckmeyer, G.; Damiani, A.; Riechelmann, S.; Rayas, J.; Labbe, F.; Laroze, D. The World's Highest Levels of Surface UV. *Photochem. Photobiol. Sci.* **2014**, *13*, 70–81, doi:10.1039/c3pp50221j. 443  
444
14. Warren-Rhodes, K.A.; McKay, C.P.; Boyle, L.N.; Wing, M.R.; Kiekebusch, E.M.; Cowan, D.A.; Stomeo, F.; Pointing, S.B.; Kaseke, K.F.; Eckardt, F.; et al. Physical Ecology of Hypolithic Communities in the Central Namib Desert: The Role of Fog, Rain, Rock Habitat, and Light. *J. Geophys. Res. Biogeosciences* **2013**, *118*, 1451–1460, doi:10.1002/jgrg.20117. 445  
446  
447
15. McKay, C.P. Full Solar Spectrum Measurements of Absorption of Light in a Sample of the Beacon Sandstone Containing the Antarctic Cryptoendolithic Microbial Community. *Antarct. Sci.* **2012**, *24*, 243–248, doi:10.1017/S0954102011000915. 448  
449
16. Croce, R.; Van Amerongen, H. Natural Strategies for Photosynthetic Light Harvesting. *Nat. Chem. Biol.* **2014**, *10*, 492–501, doi:10.1038/nchembio.1555. 450  
451
17. Ho, M.Y.; Shen, G.; Canniffe, D.P.; Zhao, C.; Bryant, D.A. Light-Dependent Chlorophyll *f* Synthase Is a Highly Divergent 452

- Paralog of PsbA of Photosystem II. *Science*. **2016**, 353, doi:10.1126/science.aaf9178. 453
18. Ho, M.Y.; Soulier, N.T.; Canniffe, D.P.; Shen, G.; Bryant, D.A. Light Regulation of Pigment and Photosystem Biosynthesis in Cyanobacteria. *Curr. Opin. Plant Biol.* **2017**, 37, 24–33, doi:10.1016/j.pbi.2017.03.006. 454  
455
19. Gan, F.; Shen, G.; Bryant, D.A. Occurrence of Far-Red Light Photoacclimation (FaRLiP) in Diverse Cyanobacteria. *Life* **2015**, 5, 4–24, doi:10.3390/life5010004. 456  
457
20. Ho, M.Y.; Gan, F.; Shen, G.; Zhao, C.; Bryant, D.A. Far-Red Light Photoacclimation (FaRLiP) in *Synechococcus* Sp. PCC 7335: I. Regulation of FaRLiP Gene Expression. *Photosynth. Res.* **2017**, 131, 173–186, doi:10.1007/s11120-016-0309-z. 458  
459
21. Ho, M.Y.; Gan, F.; Shen, G.; Bryant, D.A. Far-Red Light Photoacclimation (FaRLiP) in *Synechococcus* Sp. PCC 7335. II. Characterization of Phycobiliproteins Produced during Acclimation to Far-Red Light. *Photosynth. Res.* **2017**, 131, 187–202, doi:10.1007/s11120-016-0303-5. 460  
461  
462
22. Zhao, C.; Gan, F.; Shen, G.; Bryant, D.A. RfpA, RfpB, and RfpC Are the Master Control Elements of Far-Red Light Photoacclimation (FaRLiP). *Front. Microbiol.* **2015**, 6, 1–13, doi:10.3389/fmicb.2015.01303. 463  
464
23. Shen, G.; Canniffe, D.P.; Ho, M.Y.; Kurashov, V.; van der Est, A.; Golbeck, J.H.; Bryant, D.A. Characterization of Chlorophyll *f* Synthase Heterologously Produced in *Synechococcus* Sp. PCC 7002. *Photosynth. Res.* **2019**, 140, 77–92, doi:10.1007/s11120-018-00610-9. 465  
466  
467
24. Murray, J.W. Sequence Variation at the Oxygen-Evolving Centre of Photosystem II: A New Class of “rogue” Cyanobacterial D1 Proteins. *Photosynth. Res.* **2012**, 110, 177–184, doi:10.1007/s11120-011-9714-5. 468  
469
25. Cardona, T.; Murray, J.W.; Rutherford, A.W. Origin and Evolution of Water Oxidation before the Last Common Ancestor of the Cyanobacteria. *Mol. Biol. Evol.* **2015**, 32, 1310–1328, doi:10.1093/molbev/msv024. 470  
471
26. Antonaru, L.A.; Cardona, T.; Larkum, A.W.D.; Nürnberg, D.J. Global Distribution of a Chlorophyll *f* Cyanobacterial Marker. *ISME J.* **2020**, 14, 2275–2287, doi:10.1038/s41396-020-0670-y. 472  
473
27. Zhang, Z.C.; Li, Z.K.; Yin, Y.C.; Li, Y.; Jia, Y.; Chen, M.; Qiu, B.S. Widespread Occurrence and Unexpected Diversity of Red-Shifted Chlorophyll Producing Cyanobacteria in Humid Subtropical Forest Ecosystems. *Environ. Microbiol.* **2019**, 21, 1497–1510, doi:10.1111/1462-2920.14582. 474  
475  
476
28. Ohkubo, S.; Miyashita, H. A Niche for Cyanobacteria Producing Chlorophyll *f* within a Microbial Mat. *ISME J.* **2017**, 11, 2368–2378, doi:10.1038/ismej.2017.98. 477  
478
29. Trampe, E.; Kühl, M. Chlorophyll *f* Distribution and Dynamics in Cyanobacterial Beachrock Biofilms. *J. Phycol.* **2016**, 52, 990–996, doi:10.1111/jpy.12450. 479  
480
30. Mascoli, V.; Bersanini, L.; Croce, R. Far-Red Absorption and Light-Use Efficiency Trade-Offs in Chlorophyll *f* Photosynthesis. *Nat. Plants* **2020**, 6, 1044–1053, doi:10.1038/s41477-020-0718-z. 481  
482
31. Rippka, R.; Deruelles, J.; Waterbury, J.B. Generic Assignments, Strain Histories and Properties of Pure Cultures of Cyanobacteria. *J. Gen. Microbiol.* **1979**, 111, 1–61, doi:10.1099/00221287-111-1-1. 483  
484
32. Murray, B.; Dailey, M.; Ertekin, E.; DiRuggiero, J. Draft Metagenomes of Endolithic Cyanobacteria and Cohabitants from Hyper-Arid Deserts. *Microbiol. Resour. Announc.* **2021**, 10, 1–3, doi:10.1128/mra.00206-21. 485  
486
33. Friedmann, I. *Chroococcidiopsis* Kashaii Sp. n. and the Genus *Chroococcidiopsis* (Studies on Cave Algae from Israel III). *Österreichische Bot. Zeitschrift* **1961**, 108, 354–367, doi:10.1007/BF01289743. 487  
488
34. Lebre, P.H.; De Maayer, P.; Cowan, D.A. Xerotolerant Bacteria: Surviving through a Dry Spell. *Nat. Rev. Microbiol.* **2017**, 15, 285–296, doi:10.1038/nrmicro.2017.16. 489  
490
35. Knowles, E.J.; Castenholz, R.W. Effect of Exogenous Extracellular Polysaccharides on the Desiccation and Freezing Tolerance of Rock-Inhabiting Phototrophic Microorganisms. *FEMS Microbiol. Ecol.* **2008**, 66, 261–270, doi:10.1111/j.1574-6941.2008.00568.x. 491  
492  
493
36. Chen, M.; Schliep, M.; Willows, R.D.; Cai, Z-L; Neilan, B.A.; and Scheer H. A Red-Shifted Chlorophyll. *Science*. **2010**, 329, 1318–1320, doi:10.1126/science.1191127. 494  
495

- 
37. Canniffe, D.P.; Hunter, C.N. Engineered Biosynthesis of Bacteriochlorophyll b in *Rhodobacter Sphaeroides*. *Biochim. Biophys. Acta - Bioenerg.* **2014**, *1837*, 1611–1616, doi:10.1016/j.bbabi.2014.07.011. 496  
497
38. Bryant, D.A.; Shen, G.; Turner, G.M.; Soulier, N.; Laremore, T.N.; Ho, M.Y. Far-Red Light Allophycocyanin Subunits Play a 498  
Role in Chlorophyll d Accumulation in Far-Red Light. *Photosynth. Res.* **2020**, *143*, 81–95, doi:10.1007/s11120-019-00689-8. 499
39. Ho, M.Y.; Bryant, D.A. Global Transcriptional Profiling of the Cyanobacterium *Chlorogloeopsis Fritschii* PCC 9212 in Far- 500  
Red Light: Insights into the Regulation of Chlorophyll D Synthesis. *Front. Microbiol.* **2019**, *10*, 1–16, 501  
doi:10.3389/fmicb.2019.00465. 502
40. Kurashov, V.; Ho, M.Y.; Shen, G.; PIEDL, K.; Laremore, T.N.; Bryant, D.A.; Golbeck, J.H. Energy Transfer from Chlorophyll f 503  
to the Trapping Center in Naturally Occurring and Engineered Photosystem I Complexes. *Photosynth. Res.* **2019**, *141*, 151– 504  
163, doi:10.1007/s11120-019-00616-x. 505
41. Nürnberg, D.J.; Morton, J.; Santabarbara, S.; Telfer, A.; Joliot, P.; Antonaru, L.A.; Ruban, A. V.; Cardona, T.; Krausz, E.; 506  
Boussac, A.; et al. Photochemistry beyond the Red Limit in Chlorophyll f–Containing Photosystems. *Science.* **2018**, *360*, 1210– 507  
1213, doi:10.1126/science.aar8313. 508
42. Gisriel, C.J.; Shen, G.; Ho, M.Y.; Kurashov, V.; Flesher, D.A.; Wang, J.; Armstrong, W.H.; Golbeck, J.H.; Gunner, M.R.; Vinyard, 509  
D.J.; et al. Structure of a Monomeric Photosystem II Core Complex from a Cyanobacterium Acclimated to Far-Red Light 510  
Reveals the Functions of Chlorophylls d and F. *J. Biol. Chem.* **2022**, *298*, 101424, doi:10.1016/j.jbc.2021.101424. 511
43. Gisriel, C.J.; Flesher, D.A.; Shen, G.; Wang, J.; Ho, M.Y.; Brudvig, G.W.; Bryant, D.A. Structure of a Photosystem I-Ferredoxin 512  
Complex from a Marine Cyanobacterium Provides Insights into Far-Red Light Photoacclimation. *J. Biol. Chem.* **2022**, *298*. 513
44. Airs, R.L.; Temperton, B.; Sambles, C.; Farnham, G.; Skill, S.C.; Llewellyn, C.A. Chlorophyll f and Chlorophyll d Are 514  
Produced in the Cyanobacterium *Chlorogloeopsis Fritschii* When Cultured under Natural Light and Near-Infrared Radiation. 515  
*FEBS Lett.* **2014**, *588*, 3770–3777, doi:10.1016/j.febslet.2014.08.026. 516
45. *The Purple Phototrophic Bacteria in Advances in Photosynthesis and Respiration*. Volume 28 Hunter, C.N.; Daldal, F.; Thurnauer, 517  
M.C; Beatty, J.T. (eds). Springer. ISBN 9781402088148. 518
46. Soulier, N.; Laremore, T.N.; Bryant, D.A. Characterization of Cyanobacterial Allophycocyanins Absorbing Far-Red Light. 519  
*Photosynth. Res.* **2020**, *145*, 189–207, doi:10.1007/s11120-020-00775-2. 520
47. Gwizdala, M.; Lebre, P.H.; Maggs-Kölling, G.; Marais, E.; Cowan, D.A.; Krüger, T.P.J. Sub-Lithic Photosynthesis in Hot 521  
Desert Habitats. *Environ. Microbiol.* **2021**, *23*, 3867–3880, doi:10.1111/1462-2920.15505. 522  
523
